# Supplementary material
Source: PubMed Central journal article supplement (PMC5193024)
Supplement: supp_now139_now139supp.pdf [file supp_now139_now139supp.pdf]

## Ni et al Supplementary table

|           | <i>Oligo sequence</i>                                                           | note                      |
|-----------|---------------------------------------------------------------------------------|---------------------------|
| Primer P1 | 5'-GAA CCT CCT CGT TCG ACC-3'                                                   | pWZL-5'seq                |
| Primer P2 | 5'-TTC CGG GCC CTC ACA TTG-3'                                                   | pWZL-3'seq                |
| Primer P3 | 5'- GCA GGA TCC ACC ATG TCG TCC TGG ATA AGG TG -3'                              | NTRK2-BamHI-forward       |
| Primer P4 | 5'-GGA GAA TTC TCA CTT GTC GTC ATC GTC TTT GTA G-3'                             | NTRK2-flag-EcoRI-reverse2 |
| Primer P5 | 5'-GCA GGA TCC ATG GTC GGG GAA ATG GAA ACG AAG G- 3'                            | BamHI-QKI-forward         |
| Primer P6 | 5'-GCT GAT AAC GGA GGC TGG GCC TAA TAC ACC ACT AGG TTC-3'                       | QKI-NTRK2-reverse         |
| Primer P7 | 5'-GAA CCT AGT GGT GTA TTA GGC CCA GCC TCC GTT ATC AGC-3'                       | QKI-NTRK2-forward         |
| Primer P8 | 5'-GGA GAA TTC tca CTT GTC GTC ATC GTC TTT GTA GTC GCC TAG AAT GTC CAG GTA G-3' | EcoRI-flag-NTRK2-reverse  |

### *shRNA target sequence*

|            |                                   |
|------------|-----------------------------------|
| shStat3-#1 | 5'-CGA CTT TGA TTT CAA CTA CAA-3' |
| shStat3-#2 | 5'-CCT GAG TTG AAT TAT CAG CTT-3' |
| shStat3-#3 | 5'-GCA GGT ATC TTG AGA AGC CAA-3' |

### *Real-time PCR primers*

|       |                                                                                                  |                                  |
|-------|--------------------------------------------------------------------------------------------------|----------------------------------|
| Ccl2  | forward: 5'-CAT CCA CGT GTT GGC TCA-3'<br>reverse: 5'-AAC TAC AGC TTC TTT GGG ACA-3'             | IDT Assay ID (Mm.PT.58.42151692) |
| Gapdh | forward: 5'-TCA ACA GCA ACT CCC ACT CTT CCA-3'<br>reverse: 5'-ACC CTG TTG CTG TAG CCG TAT TCA-3' |                                  |
| Stat3 | forward: 5'-TGG CAC CTT GGA TTG AGA GTC-3'<br>reverse: 5'-GCA GGA ATC GGC TAT ATT GCT-3'         |                                  |
